# Supplementary material
Source: PubMed Central journal article supplement (PMC7963813)
Supplement: 16-00589.pdf [file 16-00589.pdf]

**On-line Table 1: Lesion characteristics and EDSS at baseline and follow-up for each patient**

| Patient | NAWM T1-RT<br>Baseline<br>(Mean) | NAWM T1-RT<br>Follow-Up<br>(Mean) | FLAIR-L T1-RT<br>Baseline<br>(Mean) | FLAIR-L T1-RT<br>Follow-Up<br>(Mean) | BH T1-RT<br>Baseline<br>(Mean) | BH T1-RT<br>Follow-Up<br>(Mean) | pureFLAIR-L T1-RT<br>Baseline<br>(Mean) | pureFLAIR-L T1-RT<br>Follow-Up<br>(Mean) | CE-L T1-RT<br>Baseline<br>(Mean) | CE-L T1-RT<br>Follow-Up<br>(Mean) | New FLAIR-L<br>at Follow-Up |
|---------|----------------------------------|-----------------------------------|-------------------------------------|--------------------------------------|--------------------------------|---------------------------------|-----------------------------------------|------------------------------------------|----------------------------------|-----------------------------------|-----------------------------|
| 1       | 831.83                           | 846.17                            | 1324.48                             | 1318.06                              | 1369.01                        | 1355.07                         | 1267.45                                 | 1283.03                                  | —                                | —                                 | 0                           |
| 2       | 808.83                           | 786.17                            | 1297.19                             | 1441.36                              | 1510.12                        | 1229.59                         | 1190.43                                 | 1397.17                                  | —                                | —                                 | 2                           |
| 3       | 860.57                           | 852.43                            | 1334.66                             | 1316.83                              | 1435.86                        | 1382.67                         | 1201.42                                 | 1200.15                                  | —                                | —                                 | 2                           |
| 4       | 881.83                           | 864.5                             | 1592.61                             | 1555.11                              | 1553.07                        | 1298.28                         | 1442.32                                 | 1537.78                                  | 1343                             | 1119.19                           | 2                           |
| 5       | 819.33                           | 793.5                             | 1261.39                             | 1137.11                              | 1380.84                        | 1280.48                         | 1191.43                                 | 1097.35                                  | 1226                             | 979.21                            | 7                           |
| 6       | 840.5                            | 820                               | 1311.55                             | 1278.21                              | 1291.24                        | 1159.79                         | 1205.08                                 | 1200.79                                  | 1343.5                           | 1183.26                           | 0                           |
| 7       | 859.83                           | 828.17                            | 1281.02                             | 1289.85                              | 1344.84                        | 1327.76                         | 1229.25                                 | 1248.98                                  | 1065.14                          | 1007.59                           | 0                           |
| 8       | 837.83                           | 810.50                            | 1338.24                             | 1332.48                              | 1470.14                        | 1359.31                         | 1317.35                                 | 1349.9                                   | 1091.33                          | 1027.92                           | 0                           |
| 9       | 837.17                           | 844.83                            | 1392.37                             | 1465.88                              | 1382.77                        | 1347.59                         | 1346.11                                 | 1435.08                                  | —                                | —                                 | 1                           |
| 10      | 881.71                           | 872.86                            | 1454.75                             | 1516.81                              | 1569.02                        | 1634.04                         | 1415.67                                 | 1478.68                                  | —                                | —                                 | 16                          |
| 11      | 886.4                            | 854                               | 1376.3                              | 1404.02                              | 1514.01                        | 1429.25                         | 1281.06                                 | 1306.85                                  | 1476                             | 1474.21                           | 0                           |
| 12      | 866.83                           | 863.5                             | 1406.45                             | 1428.04                              | 1652.81                        | 1670.15                         | 1303.86                                 | 1334.01                                  | —                                | —                                 | 0                           |
| 13      | 847                              | 844                               | 1211.66                             | 1186.21                              | —                              | —                               | 1211.66                                 | 1272.01                                  | —                                | —                                 | 5                           |
| 14      | 868                              | 880.67                            | 1602.39                             | 1625.64                              | 1574.76                        | 1360.24                         | 1565.65                                 | 1623.23                                  | —                                | —                                 | 0                           |
| 15      | 833.83                           | 846.83                            | 1162.07                             | 1162.6                               | 1454.41                        | 1334.91                         | 1162.07                                 | 1162.60                                  | 1124                             | 1071.37                           | 0                           |
| 16      | 857.83                           | 847.83                            | 1337.38                             | 1312.24                              | 1354.22                        | 1334.91                         | 1180.70                                 | 1162.29                                  | —                                | —                                 | 0                           |
| 17      | 854                              | 852.67                            | 1401.38                             | 1315.25                              | 1436.85                        | 1348.45                         | 1327.69                                 | 1271.26                                  | 1440                             | 1072.2                            | 0                           |

**Note:**—FLAIR-L indicates FLAIR lesion; pureFLAIR-L, pure FLAIR lesion.

**On-line Table 2: Mean and SD for T1-RT at baseline and follow-up**

| Time Point      | NAWM              | FLAIR-L             | BH                  | pureFLAIR-L         | CE-L                |
|-----------------|-------------------|---------------------|---------------------|---------------------|---------------------|
| Baseline T1-RT  | 851.34 ± 30.61 ms | 1400.38 ± 189.1 ms  | 1460.21 ± 209.46 ms | 1327.5 ± 210.04 ms  | 1205.59 ± 199.95 ms |
| Follow-up T1-RT | 841.98 ± 36.1 ms  | 1383.33 ± 274.53 ms | 1369.4 ± 267.81 ms  | 1322.64 ± 305.07 ms | 1079.57 ± 183.36 ms |
| ΔT1-RT          | -9.36 ms          | -17.05 ms           | -90.81 ms           | -4.86 ms            | -126.02 ms          |
| P value         | .006              | .08                 | <.001               | .63                 | <.001               |

**Note:**—FLAIR-L indicates FLAIR lesion; pureFLAIR-L, pure FLAIR lesion.
